# Supplementary material for: Molecular, 1D and 2D assemblies from hexakis(3-pyridyloxy)cyclophosphazene containing 20-membered metallamacrocyclic motifs
Source: Royal Society of Chemistry journal article supplement (doi:10.1039/c5dt03537f), 2015-11-27
Supplement: c5dt03537f1.pdf [file c5dt03537f1.pdf]

**Electronic Supplementary Information**

**Molecular, 1D and 2D Assemblies from Hexakis(3-  
pyridyloxy)cyclophosphazene Containing 20-membered  
Metallamacrocyclic Motifs**

**Vadapalli Chandrasekhar<sup>\*a,b</sup> and Ramakirushnan Suriyanarayanan**

<sup>a</sup>Department of Chemistry, Indian Institute of Technology, Kanpur, Kanpur 208 016, India

<sup>b</sup>National Institute of Science Education and Research, PO: Bhipur, Via: Jatni, Kurdha - 752 060, India

**Corresponding Author: Email: [vc@iitk.ac.in](mailto:vc@iitk.ac.in); Tel: +91 512 259 7259. Fax: +91 512 259 7436.**

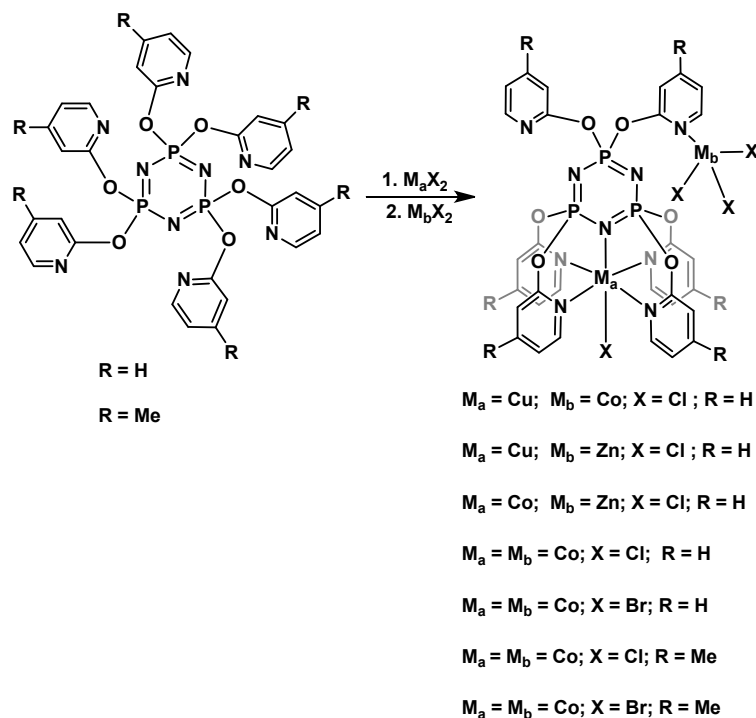

Scheme S1. Hetero and homobimetallic compounds of 2-pyridyloxy cyclophosphazenes (References: 1) G. A. Carriedo, P. G. Elipe, F. J. G. Alonso, L. F. Catuxo, M. R. Díaz and S. G. Granda, *J. Organomet. Chem.*, 1995, **498**, 207. 2) G. A. Carriedo, F. J. G. Alonso, J. L. Garcia, R. J. Carbajo and F. L. Ortiz, *Eur. J. Inorg. Chem.*, 1999, 1015. 3) Y. Cho, H. Baek and Y. S. Sohn, *Macromolecules*, 1999, **32**, 2167. 4) E. W. Ainscough, A. M. Brodie and C. V. Depree, *J. Chem. Soc., Dalton Trans.*, 1999, 4123. 5) E. W. Ainscough, A. M. Brodie, B. Moubaraki, K. S. Murray and C. A. Otter, *J. Chem. Soc., Dalton Trans.*, 2005, 3337. 6) E. W. Ainscough, A. M. Brodie, C. V. Depree, G. B. Jameson and C. A. Otter, *Inorg. Chem.*, 2005, **44**, 7325. 7) V. Chandrasekhar, B. M. Pandian and R. Azhakar, *Inorg. Chem.*, 2006, **45**, 3510. 8) E. W. Ainscough, A. M. Brodie, A. B. Chaplin, A. Derwahl, J. A. Harrison and C. A. Otter, *Inorg. Chem.*, 2007, **46**, 2575. 9) V. Chandrasekhar, B. M. Pandian and R. Azhakar, *Polyhedron*, 2008, **27**, 255. 10) E. W. Ainscough, A. M. Brodie, R. J. Davidson, B. Moubaraki, K. S. Murray, C. A. Otter and M. A. Waterland, *Inorg. Chem.*, 2008, **47**, 9182. 11) E. W. Ainscough, A. M. Brodie, R. J. Davison and C. A. Otter, *Inorg. Chem. Commun.*, 2008, **11**, 171. 12) E. W. Ainscough, A. M. Brodie, P. J. B. Edwards, G. B. Jameson, C. A. Otter and S. Kirk, *Inorg. Chem.*, 2012, **51**, 10884.)



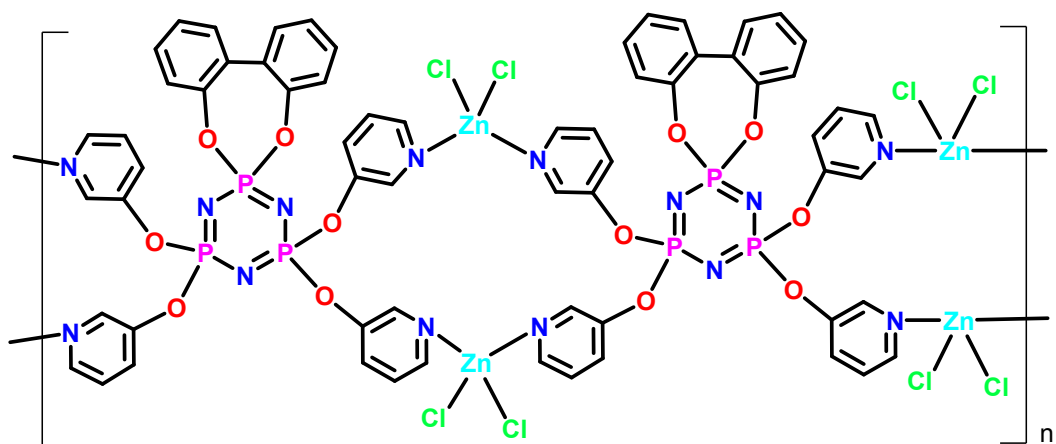

Chart S2. [ $\{spiro-N_3P_3(O_2C_{12}H_8)(O-C_5H_4N-3)_4\} \{ZnCl_2\}_n$ ] (Reference: V. Chandrasekhar and R. S. Narayanan, *Dalton Trans.*, 2013, **42**, 6619.)

Table S1. Coordination environment around the metal ions in the compounds **1-4**

| Compound | Environment around metal                                                                                                     | Bond length ( Å )    | Bond angles ( ° )            |
|----------|------------------------------------------------------------------------------------------------------------------------------|----------------------|------------------------------|
| <b>1</b> | Macrocyclic part<br>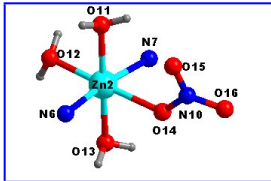<br>Octahedral-2N, 4O | Zn(2)-O(11) 2.065(4) | O(11)-Zn(2)-O(13) 175.90(16) |
|          |                                                                                                                              | Zn(2)-O(13) 2.095(4) | O(11)-Zn(2)-O(12) 81.61(19)  |
|          |                                                                                                                              | Zn(2)-O(12) 2.096(5) | O(13)-Zn(2)-O(12) 95.93(18)  |
|          |                                                                                                                              | Zn(2)-N(6) 2.118(5)  | O(11)-Zn(2)-N(6) 92.13(18)   |
|          |                                                                                                                              | Zn(2)-N(7) 2.148(5)  | O(13)-Zn(2)-N(6) 91.39(18)   |
|          |                                                                                                                              | Zn(2)-O(14) 2.207(4) | O(12)-Zn(2)-N(6) 95.80(18)   |
|          |                                                                                                                              |                      | O(11)-Zn(2)-N(7) 89.06(18)   |
|          |                                                                                                                              |                      | O(13)-Zn(2)-N(7) 87.76(17)   |
|          |                                                                                                                              |                      | O(12)-Zn(2)-N(7) 92.36(19)   |

|   |                                                                                                                             |                                                                                                                                                                                    |                                                                                                                                                                                                                                                                                                                                                                                                                                                                                                                                                                                                                                        |
|---|-----------------------------------------------------------------------------------------------------------------------------|------------------------------------------------------------------------------------------------------------------------------------------------------------------------------------|----------------------------------------------------------------------------------------------------------------------------------------------------------------------------------------------------------------------------------------------------------------------------------------------------------------------------------------------------------------------------------------------------------------------------------------------------------------------------------------------------------------------------------------------------------------------------------------------------------------------------------------|
|   |                                                                                                                             |                                                                                                                                                                                    | N(6)-Zn(2)-N(7) 171.83(18)<br>O(11)-Zn(2)-O(14) 100.35(16)<br>O(13)-Zn(2)-O(14) 81.81(16)<br>O(12)-Zn(2)-O(14) 174.50(17)<br>N(6)-Zn(2)-O(14) 89.28(16)<br>N(7)-Zn(2)-O(14) 82.56(17)                                                                                                                                                                                                                                                                                                                                                                                                                                                  |
|   | Connecting part<br>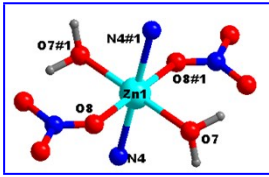<br>Octahedral-2N, 4O   | Zn(1)-N(4) <sup>#1</sup> 2.115(5)<br>Zn(1)-N(4) 2.115(5)<br>Zn(1)-O(7) 2.137(5)<br>Zn(1)-O(7) <sup>#1</sup> 2.137(5)<br>Zn(1)-O(8) 2.394(10)<br>Zn(1)-O(8) <sup>#1</sup> 2.394(10) | N(4) <sup>#1</sup> -Zn(1)-N(4) 180.0<br>N(4) <sup>#1</sup> -Zn(1)-O(7) 90.5(2)<br>N(4)-Zn(1)-O(7) 89.5(2)<br>N(4) <sup>#1</sup> -Zn(1)-O(7) <sup>#1</sup> 89.5(2)<br>N(4)-Zn(1)-O(7) <sup>#1</sup> 90.5(2)<br>O(7)-Zn(1)-O(7) <sup>#1</sup> 180.0<br>N(4) <sup>#1</sup> -Zn(1)-O(8) 90.0(2)<br>N(4)-Zn(1)-O(8) 90.0(2)<br>O(7)-Zn(1)-O(8) 77.4(2)<br>O(7) <sup>#1</sup> -Zn(1)-O(8) 102.6(2)<br>N(4) <sup>#1</sup> -Zn(1)-O(8) <sup>#1</sup> 90.0(2)<br>N(4)-Zn(1)-O(8) <sup>#1</sup> 90.0(2)<br>O(7)-Zn(1)-O(8) <sup>#1</sup> 102.6(2)<br>O(7) <sup>#1</sup> -Zn(1)-O(8) <sup>#1</sup> 77.4(2)<br>O(8)-Zn(1)-O(8) <sup>#1</sup> 180.0 |
| 2 | Macrocycle part<br><br>Octahedral-2N, 4O | Zn(1)-N(5) 2.077(5)<br>Zn(1)-N(4) 2.085(5)<br>Zn(1)-O(8) 2.097(5)<br>Zn(1)-O(7) 2.133(4)<br>Zn(1)-O(9) 2.153(5)<br>Zn(1)-O(12) 2.172(6)                                            | N(5)-Zn(1)-N(4) 176.32(18)<br>N(5)-Zn(1)-O(8) 92.45(18)<br>N(4)-Zn(1)-O(8) 89.46(18)<br>N(5)-Zn(1)-O(7) 89.62(18)<br>N(4)-Zn(1)-O(7) 87.45(18)<br>O(8)-Zn(1)-O(7) 83.86(17)<br>N(5)-Zn(1)-O(9) 90.48(19)                                                                                                                                                                                                                                                                                                                                                                                                                               |

|   |                                                                                                                                                   |                                                                                                                                                                                                            |                                                                                                                                                                                                                                                                                 |
|---|---------------------------------------------------------------------------------------------------------------------------------------------------|------------------------------------------------------------------------------------------------------------------------------------------------------------------------------------------------------------|---------------------------------------------------------------------------------------------------------------------------------------------------------------------------------------------------------------------------------------------------------------------------------|
|   |                                                                                                                                                   |                                                                                                                                                                                                            | <p>N(4)-Zn(1)-O(9) 92.70(19)</p> <p>O(8)-Zn(1)-O(9) 89.25(19)</p> <p>O(7)-Zn(1)-O(9) 173.10(18)</p> <p>N(5)-Zn(1)-O(12) 87.27(18)</p> <p>N(4)-Zn(1)-O(12) 91.38(18)</p> <p>O(8)-Zn(1)-O(12) 170.11(18)</p> <p>O(7)-Zn(1)-O(12) 106.01(18)</p> <p>O(9)-Zn(1)-O(12) 80.88(19)</p> |
|   | <p>Connecting part</p>  <p>Octahedral-4N, 2O</p>                 | <p>Cu(1)-N(7) 2.023(5)</p> <p>Cu(1)-N(7)<sup>#2</sup> 2.023(5)</p> <p>Cu(1)-N(8)<sup>#2</sup> 2.025(5)</p> <p>Cu(1)-N(8) 2.025(5)</p> <p>Cu(1)-O(15) 2.513(7)</p> <p>Cu(1)-O(15)<sup>#2</sup> 2.513(7)</p> | <p>N(7)-Cu(1)-N(7)<sup>#2</sup> 180.0</p> <p>N(7)-Cu(1)-N(8)<sup>#2</sup> 90.36(19)</p> <p>N(7)#1-Cu(1)-N(8)<sup>#2</sup> 89.64(19)</p> <p>N(7)-Cu(1)-N(8) 89.64(19)</p> <p>N(7)<sup>#2</sup>-Cu(1)-N(8) 90.36(19)</p> <p>N(8)<sup>#2</sup>-Cu(1)-N(8) 180.0</p>                |
| 3 | <p>Terminal Cadmium</p>  <p>Pentagonalbipyramid<br/>N4, O3</p> | <p>Cd(1)-N(11) 2.304(6)</p> <p>Cd(1)-O(13) 2.466(5)</p> <p>Cd(1)-O(14) 2.506(6)</p> <p>Cd(1)-N(9) 2.368(6)</p> <p>Cd(1)-N(8) 2.333(5)</p> <p>Cd(1)-O(16) 2.472(6)</p> <p>Cd(1)-N(10) 2.418(6)</p>          | <p>N(11)-Cd(1)-O(13) 95.315(2)</p> <p>O(13)-Cd(1)-O(14) 51.437(2)</p> <p>O(14)-Cd(1)-N(9) 76.072(2)</p> <p>N(9)-Cd(1)-N(8) 92.801(2)</p> <p>N(8)-Cd(1)-O(16) 78.954(2)</p> <p>O(16)-Cd(1)-N(10) 80.963(2)</p> <p>N(10)-Cd(1)-N(1) 92.368(2)</p>                                 |
|   | <p>Center Cadmium</p>  <p>Octahedral-2N, 4O</p>                | <p>Cd(2)-N(13) 2.363(6)</p> <p>Cd(2)-O(17) 2.526(5)</p> <p>Cd(2)-O(22) 2.235(5)</p> <p>Cd(2)-O(19) 2.261(6)</p> <p>Cd(2)-O(25) 2.548(7)</p> <p>Cd(2)-N(14) 2.332(5)</p>                                    | <p>N(13)-Cd(2)-O(17) 94.556(2)</p> <p>O(17)-Cd(2)-O(22) 104.131(2)</p> <p>O(22)-Cd(2)-O(19) 113.485(2)</p> <p>O(19)-Cd(2)-O(25) 99.930(2)</p> <p>O(25)-Cd(2)-N(14) 76.148(2)</p> <p>N(14)-Cd(2)-N(13) 89.450(2)</p> <p>N(13)-Cd(2)-O(17) 77.075(2)</p>                          |

|   |                                                                                                                                                     |                                                                                                                                                                                                                                                                                                                                               |                                                                                                                                                                                                                                                                                                                                                                                                                                                                                                                                                                                                                                                                                                                                                                                                                                                                                                                                                                                 |
|---|-----------------------------------------------------------------------------------------------------------------------------------------------------|-----------------------------------------------------------------------------------------------------------------------------------------------------------------------------------------------------------------------------------------------------------------------------------------------------------------------------------------------|---------------------------------------------------------------------------------------------------------------------------------------------------------------------------------------------------------------------------------------------------------------------------------------------------------------------------------------------------------------------------------------------------------------------------------------------------------------------------------------------------------------------------------------------------------------------------------------------------------------------------------------------------------------------------------------------------------------------------------------------------------------------------------------------------------------------------------------------------------------------------------------------------------------------------------------------------------------------------------|
| 4 | 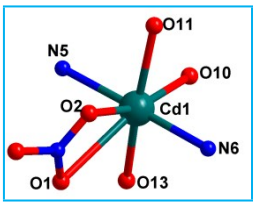 <p data-bbox="391 526 646 604">Pentagonalbipyramid<br/>2N, 5O</p> | <p data-bbox="694 190 957 235">Cd(1)-O(10) 2.313(6)</p> <p data-bbox="694 257 957 302">Cd(1)-O(11) 2.295(8)</p> <p data-bbox="694 324 957 369">Cd(1)-N(4) 2.290(7)</p> <p data-bbox="694 392 957 436">Cd(1)-N(5) 2.307(6)</p> <p data-bbox="694 459 957 504">Cd(1)-O(12) 2.361(7)</p> <p data-bbox="694 526 957 571">Cd(1)-O(13) 2.384(6)</p> | <p data-bbox="1061 190 1380 235">N(4)-Cd(1)-O(11) 92.6(3)</p> <p data-bbox="1061 257 1396 302">N(4)-Cd(1)-N(5) 178.1(2)</p> <p data-bbox="1061 324 1380 369">O(11)-Cd(1)-N(5) 89.3(3)</p> <p data-bbox="1061 392 1380 436">N(4)-Cd(1)-O(10) 90.8(2)</p> <p data-bbox="1061 459 1380 504">O(11)-Cd(1)-O(10) 82.9(3)</p> <p data-bbox="1061 526 1380 571">N(5)-Cd(1)-O(10) 89.6(2)</p> <p data-bbox="1061 593 1380 638">N(4)-Cd(1)-O(12) 92.6(2)</p> <p data-bbox="1061 660 1380 705">O(11)-Cd(1)-O(12) 85.1(3)</p> <p data-bbox="1061 728 1380 772">N(5)-Cd(1)-O(12) 87.4(2)</p> <p data-bbox="1061 795 1396 840">O(10)-Cd(1)-O(12) 167.7(2)</p> <p data-bbox="1061 862 1380 907">N(4)-Cd(1)-O(13) 88.1(2)</p> <p data-bbox="1061 929 1396 974">O(11)-Cd(1)-O(13) 160.7(3)</p> <p data-bbox="1061 996 1380 1041">N(5)-Cd(1)-O(13) 90.0(2)</p> <p data-bbox="1061 1064 1396 1108">O(10)-Cd(1)-O(13) 116.3(2)</p> <p data-bbox="1061 1131 1380 1176">O(12)-Cd(1)-O(13) 75.6(2)</p> |
|---|-----------------------------------------------------------------------------------------------------------------------------------------------------|-----------------------------------------------------------------------------------------------------------------------------------------------------------------------------------------------------------------------------------------------------------------------------------------------------------------------------------------------|---------------------------------------------------------------------------------------------------------------------------------------------------------------------------------------------------------------------------------------------------------------------------------------------------------------------------------------------------------------------------------------------------------------------------------------------------------------------------------------------------------------------------------------------------------------------------------------------------------------------------------------------------------------------------------------------------------------------------------------------------------------------------------------------------------------------------------------------------------------------------------------------------------------------------------------------------------------------------------|

Symmetry transformations used to generate equivalent atoms:

#1 -x+1,-y+1,-z+1, #2 -x+1,-y+1,-z+1

**Table S2.** P-N and P-O bond distances and P-N-P and N-P-N bond angles for compounds **L**, **1** to **4**

| Compound              | P-N and P-O bond distance (Å) |                    | P-N-P and N-P-N bond angle (°) |
|-----------------------|-------------------------------|--------------------|--------------------------------|
| <b>L</b> <sup>1</sup> | P(1)-N(1) 1.568(3)            | P(1)-O(1) 1.579(2) | N(1)-P(1)-N(3) 117.3(3)        |
|                       | P(1)-N(3) 1.574(3)            | P(1)-O(2) 1.584(2) | N(1)-P(2)-N(2) 118.20(13)      |
|                       | P(2)-N(1) 1.569(3)            | P(2)-O(3) 1.577(2) | N(3)-P(3)-N(2) 117.24(13)      |
|                       | P(2)-N(2) 1.574(3)            | P(2)-O(4) 1.583(2) | P(1)-N(1)-P(2) 122.5(2)        |
|                       | P(3)-N(2) 1.575(3)            | P(3)-O(5) 1.572(2) | P(2)-N(2)-P(3) 122.4(2)        |
|                       | P(3)-N(3) 1.577(3)            | P(3)-O(6) 1.575(2) | P(3)-N(3)-P(1) 121.8(2)        |

|          |                    |                    |                         |
|----------|--------------------|--------------------|-------------------------|
| <b>1</b> | P(1)-N(1) 1.581(5) | O(1)-P(1) 1.588(4) | N(1)-P(1)-N(3) 117.5(3) |
|          | P(1)-N(3) 1.573(5) | O(2)-P(1) 1.594(5) | N(1)-P(2)-N(2) 117.9(3) |
|          | P(2)-N(1) 1.585(5) | O(3)-P(2) 1.589(5) | N(3)-P(3)-N(2) 118.5(3) |
|          | P(2)-N(2) 1.579(5) | O(4)-P(2) 1.595(4) | P(1)-N(1)-P(2) 121.4(3) |
|          | P(3)-N(2) 1.580(5) | O(5)-P(3) 1.572(5) | P(2)-N(2)-P(3) 120.8(3) |
|          | P(3)-N(3) 1.571(5) | O(6)-P(3) 1.589(5) | P(3)-N(3)-P(1) 122.2(3) |
| <b>2</b> | P(1)-N(1) 1.571(6) | O(1)-P(1) 1.583(4) | N(1)-P(1)-N(3) 117.8(3) |
|          | P(1)-N(3) 1.579(6) | O(2)-P(1) 1.592(4) | N(1)-P(2)-N(2) 115.7(3) |
|          | P(2)-N(1) 1.590(6) | O(3)-P(2) 1.589(4) | N(3)-P(3)-N(2) 118.5(3) |
|          | P(2)-N(2) 1.586(6) | O(4)-P(2) 1.584(4) | P(1)-N(1)-P(2) 122.4(3) |
|          | P(3)-N(2) 1.569(6) | O(5)-P(3) 1.600(4) | P(2)-N(2)-P(3) 121.7(3) |
|          | P(3)-N(3) 1.581(6) | O(6)-P(3) 1.576(6) | P(3)-N(3)-P(1) 120.1(3) |
| <b>3</b> | P(1)-N(1) 1.583(5) | O(1)-P(1) 1.583(4) | N(1)-P(1)-N(3) 116.3(3) |
|          | P(1)-N(3) 1.584(5) | O(2)-P(1) 1.586(4) | N(1)-P(2)-N(2) 117.1(3) |
|          | P(2)-N(1) 1.572(5) | O(3)-P(2) 1.581(4) | N(3)-P(3)-N(2) 117.5(3) |
|          | P(2)-N(2) 1.586(5) | O(4)-P(2) 1.590(4) | P(1)-N(1)-P(2) 122.0(3) |
|          | P(3)-N(2) 1.582(5) | O(5)-P(3) 1.586(4) | P(2)-N(2)-P(3) 119.4(3) |
|          | P(3)-N(3) 1.573(5) | O(6)-P(3) 1.579(4) | P(3)-N(3)-P(1) 120.2(3) |
| <b>4</b> | P(1)-N(1) 1.577(6) | O(1)-P(1) 1.602(5) | N(1)-P(1)-N(3) 119.1(3) |
|          | P(1)-N(3) 1.585(6) | O(2)-P(1) 1.582(5) | N(1)-P(2)-N(2) 115.6(3) |
|          | P(2)-N(1) 1.590(6) | O(3)-P(2) 1.578(5) | N(3)-P(3)-N(2) 118.5(3) |
|          | P(2)-N(2) 1.581(6) | O(4)-P(2) 1.582(5) | P(1)-N(1)-P(2) 122.0(4) |
|          | P(3)-N(2) 1.583(7) | O(5)-P(3) 1.572(5) | P(2)-N(2)-P(3) 121.0(4) |
|          | P(3)-N(3) 1.598(6) | O(6)-P(3) 1.584(5) | P(3)-N(3)-P(1) 118.5(4) |

Reference:

- 1) Y. Cho, H. Baek and Y. S. Sohn, *Macromolecules*, 1999, **32**, 2167.

**Table S3.** Mean plane data for compounds **1** to **4**

|    | Distance from the mean plane (Å) |          |          |          |
|----|----------------------------------|----------|----------|----------|
|    | <b>1</b>                         | <b>2</b> | <b>3</b> | <b>4</b> |
| P1 | 0.012                            | -0.125   | -0.057   | 0.128    |



|    |        |        |        |        |
|----|--------|--------|--------|--------|
| P2 | 0.089  | 0.080  | -0.080 | -0.068 |
| P3 | -0.046 | 0.051  | 0.188  | -0.073 |
| N1 | -0.084 | 0.048  | 0.156  | -0.066 |
| N2 | -0.025 | -0.131 | -0.092 | 0.139  |
| N3 | 0.053  | 0.078  | -0.115 | 0.061  |

Table S4. Olex-2 mask details:

| Compound | Masked electron count | Calculated solvent            |
|----------|-----------------------|-------------------------------|
| 4        | 151                   | MeOH, 2H <sub>2</sub> O (152) |

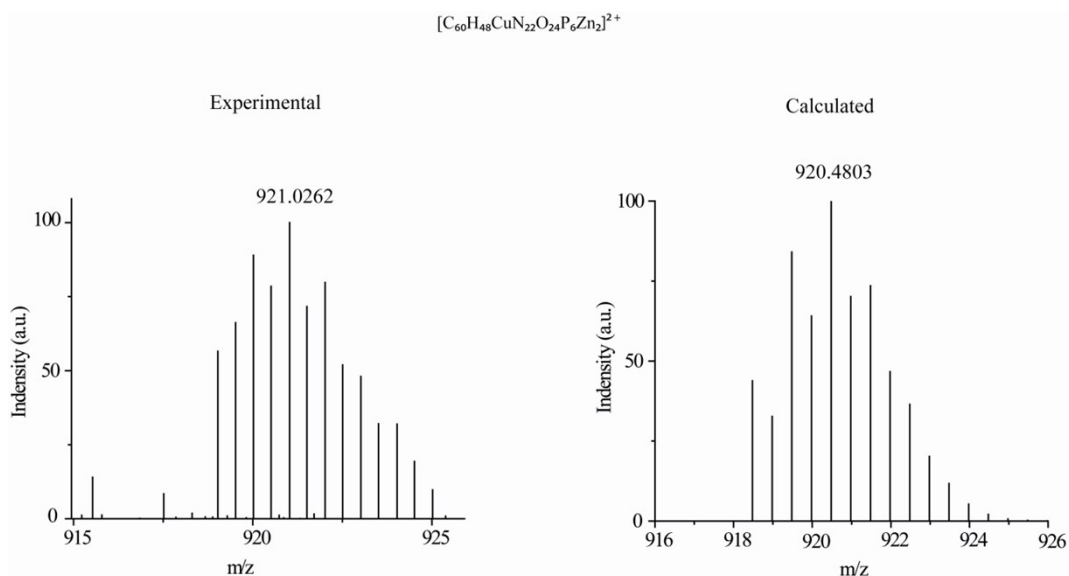

Figure S1. ESI-MS (a) experimental and (b) calculated spectra for the fragment ion  $[\{\text{N}_3\text{P}_3(\text{O}-\text{C}_5\text{H}_4\text{N}-3)_6\{\text{Zn}(\text{NO}_3)_2\}\{\text{Cu}(\text{NO}_3)_2\}]$

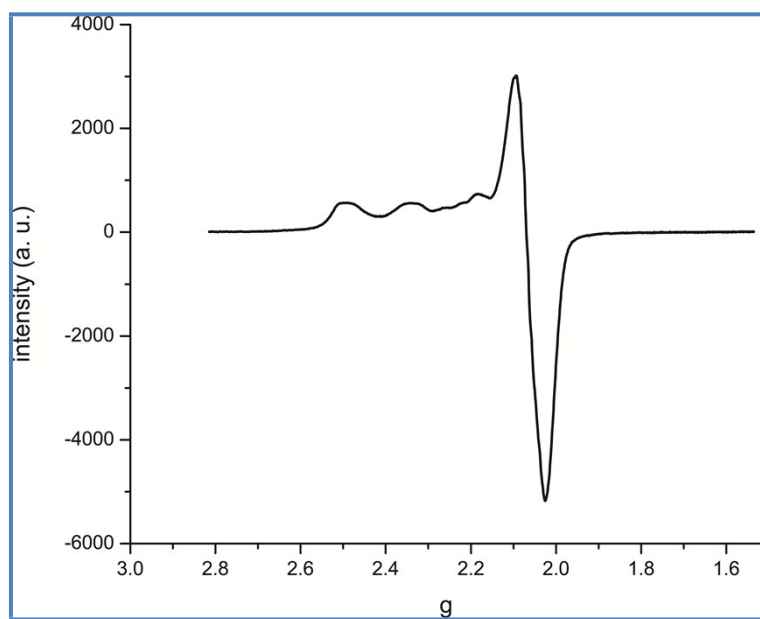

Figure S2: EPR spectrum of compound **2** in DMF-toluene glass at  $-120\text{ }^\circ\text{C}$

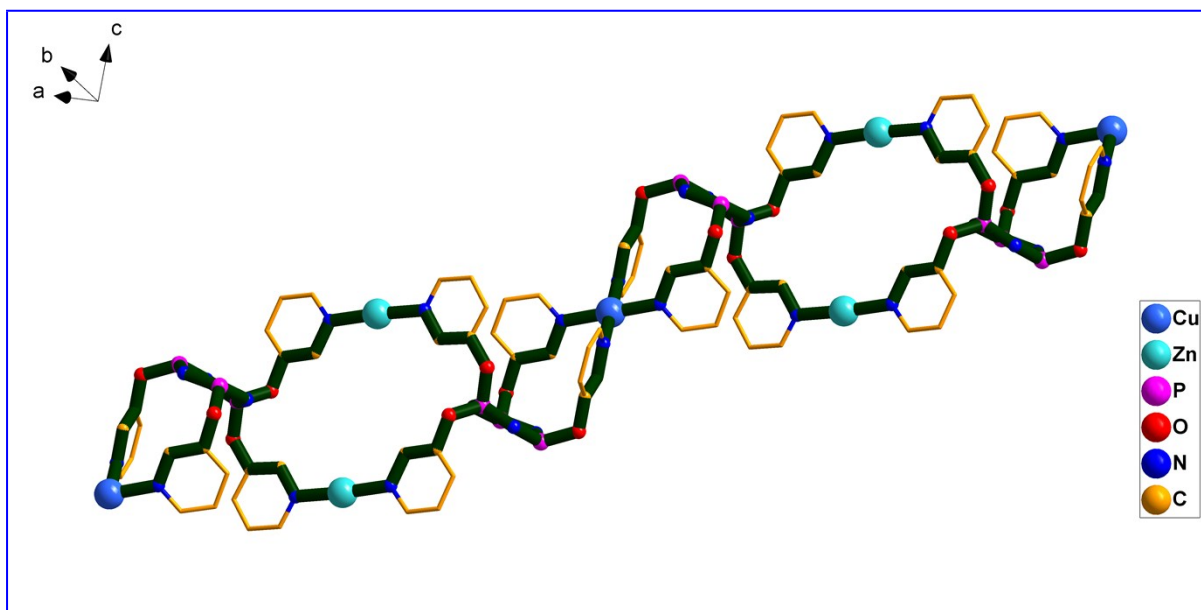

Figure S3. A representation of the double helix like 1D coordination polymer **2**. Hydrogen atoms, non-coordinating pyridyloxy groups, coordinated water and nitrate anions are omitted for clarity

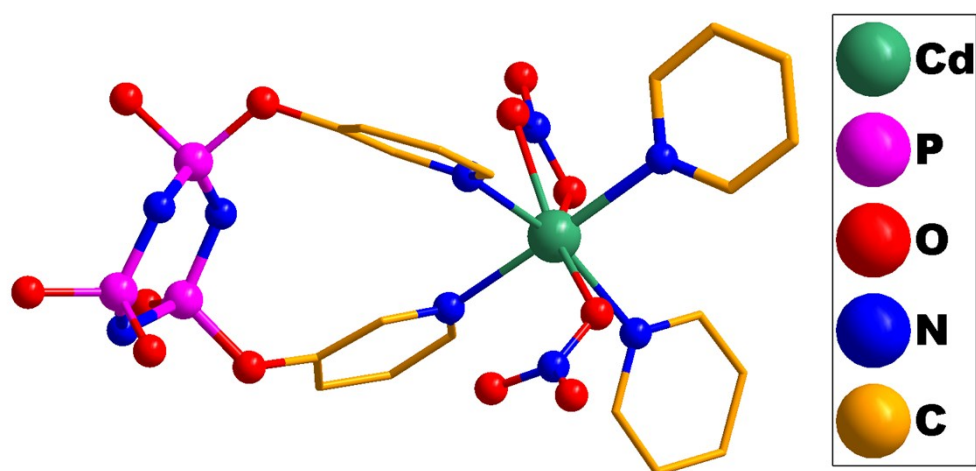

Figure S4. 12 membered metallamacrocycle found in compound **3** (**1L**; **2 non-gem pyridyloxy** + **1Cd**): **LM**

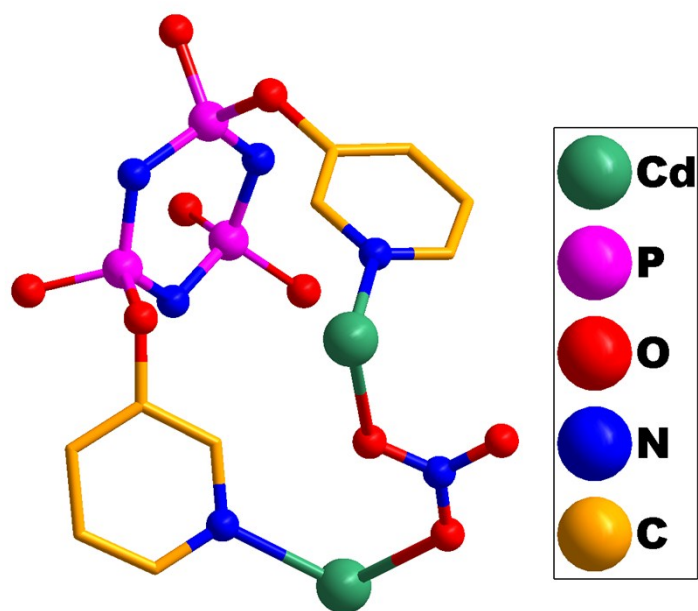

Figure S5. 16- membered metallamacrocycle found in compound 3

**LM<sub>2</sub>** ( two non-gem pyridyloxy coordinate to two separate Cds. The latter are connected by bridging of nitrate, O-N-O)

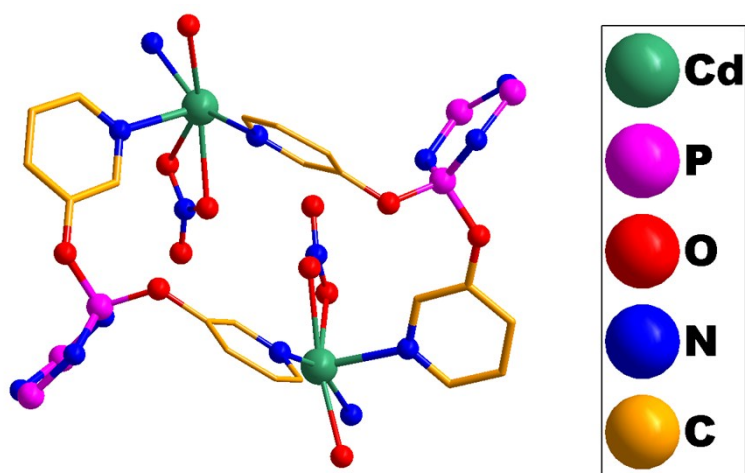

Figure S6. 20-membered metallamacrocycle found in compound 3

**L2M2**(A pair of geminal pyridyloxy nirogens)

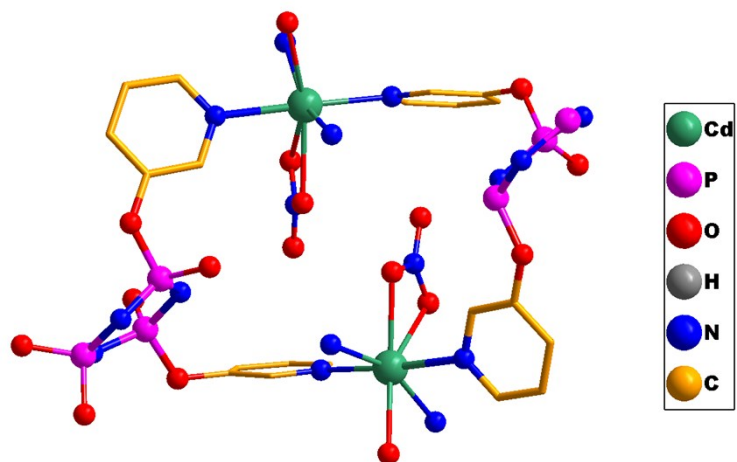

Figure S7. 24 membered metallamacrocycle in compound **3**

**L2M2 (A pair of non-geminal pyridyloxy groups)**

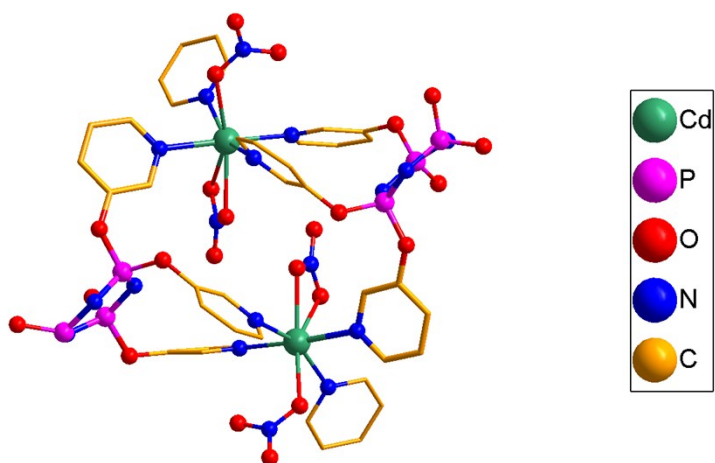

Figure S8. 12, 16, 20 and 24 membered metallamacrocycles in compound **3**

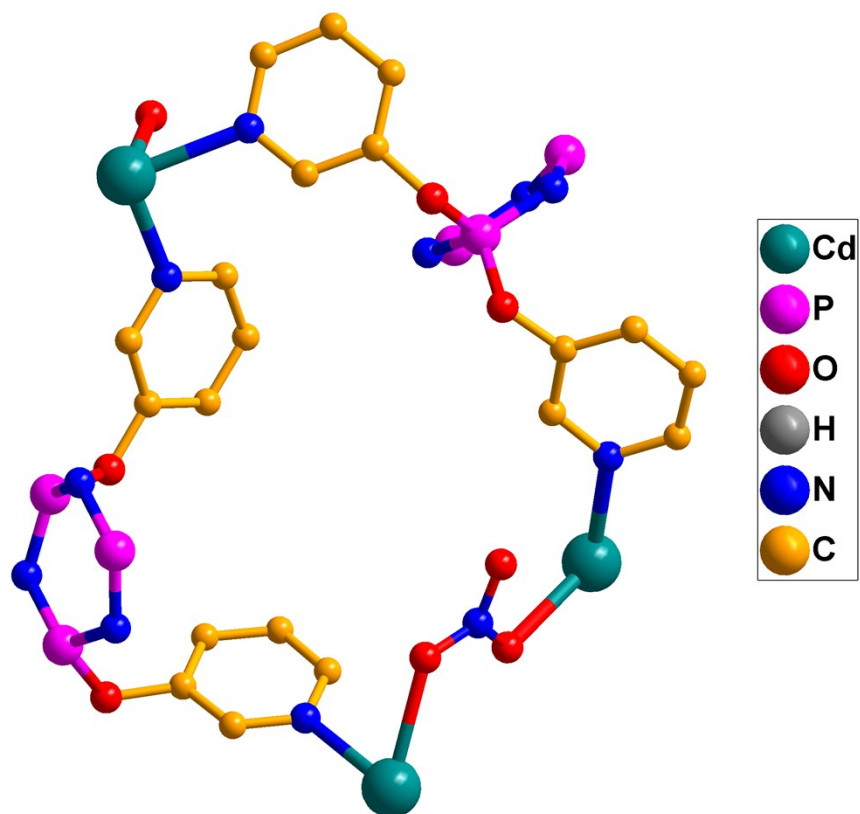

Figure S9. A view of the 26 membered metallamacrocycle L2M3 (A pair of geminal and non-gem pyridyloxy groups coordinating to two different Cd centers; these are further connected to two other Cds through a nitrate groups: O-N-O)

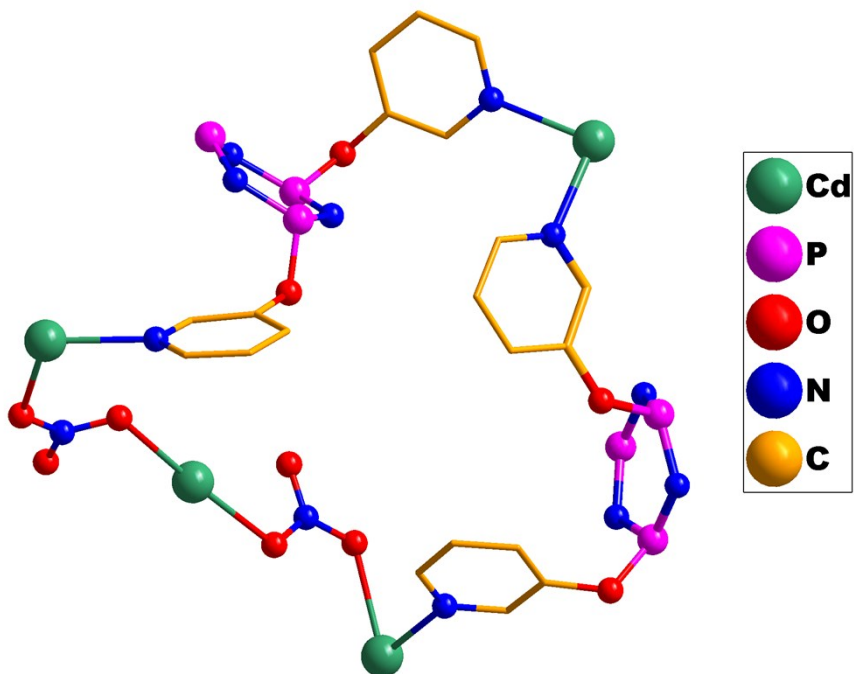

Figure S10. 32 membered metallamacrocycle in compound **3**. **L2M4** (two pairs of non-gem pyridyloxy groups coordinating to two different Cd centers; these are further connected to two other Cds through two nitrate groups: O-N-O)

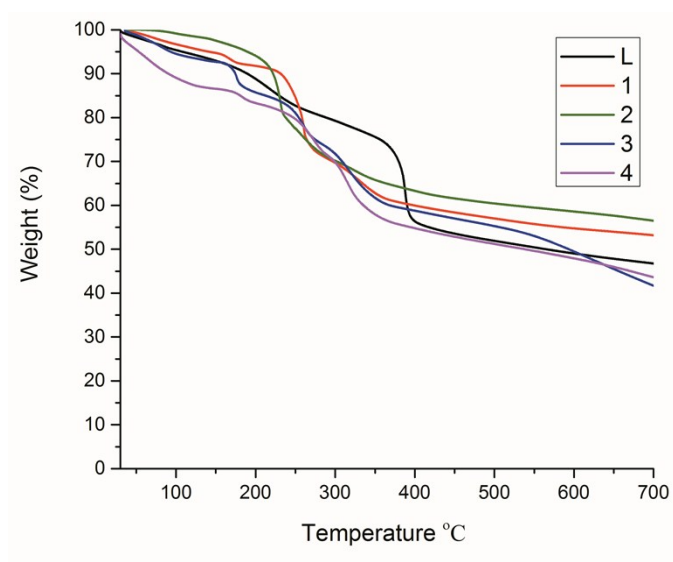

Figure S11: TGA curves for compounds **L**, **1** to **4**





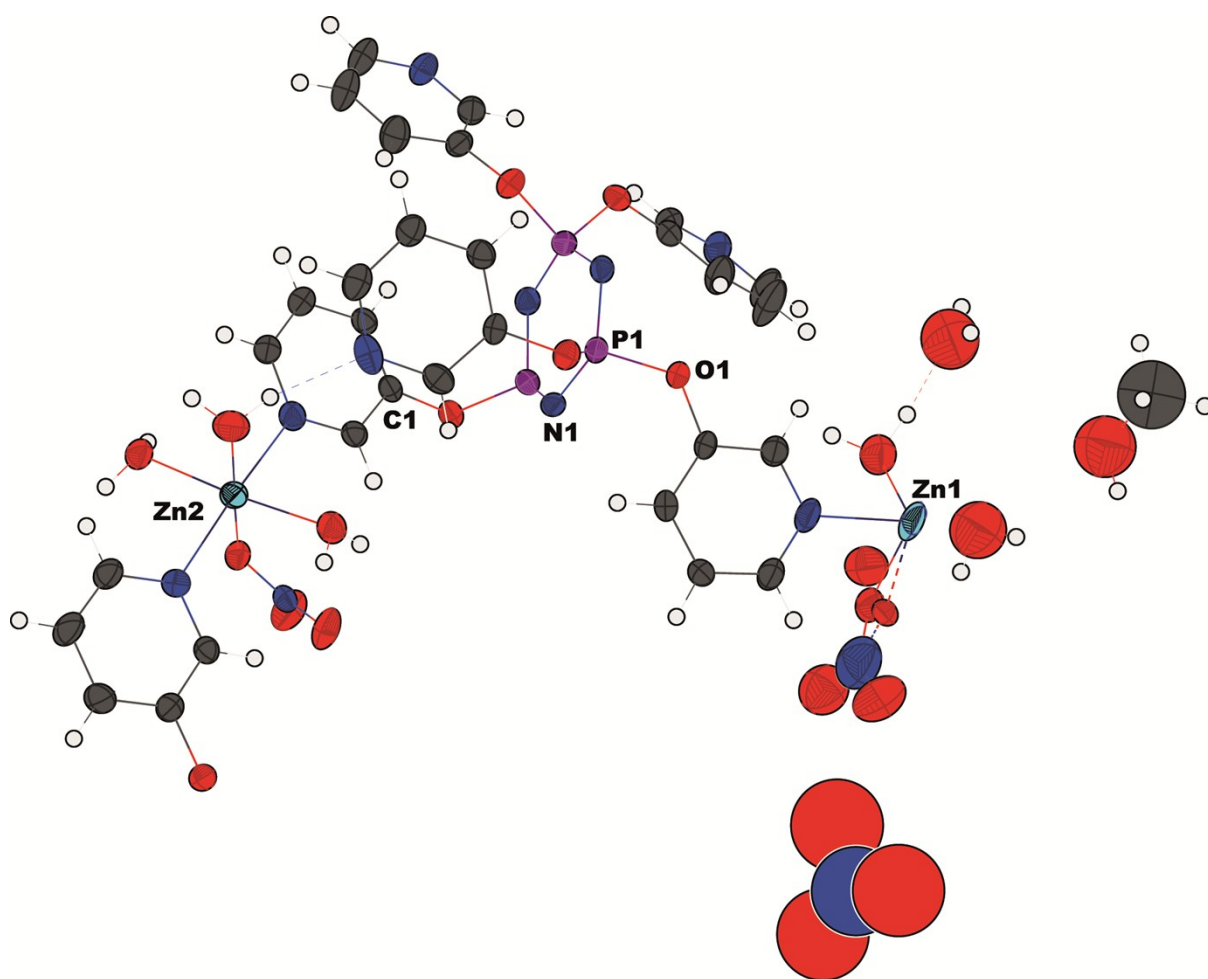

Figure S12. Thermal ellipsoid plot (50 % probability) of asymmetric unit of Compound 1

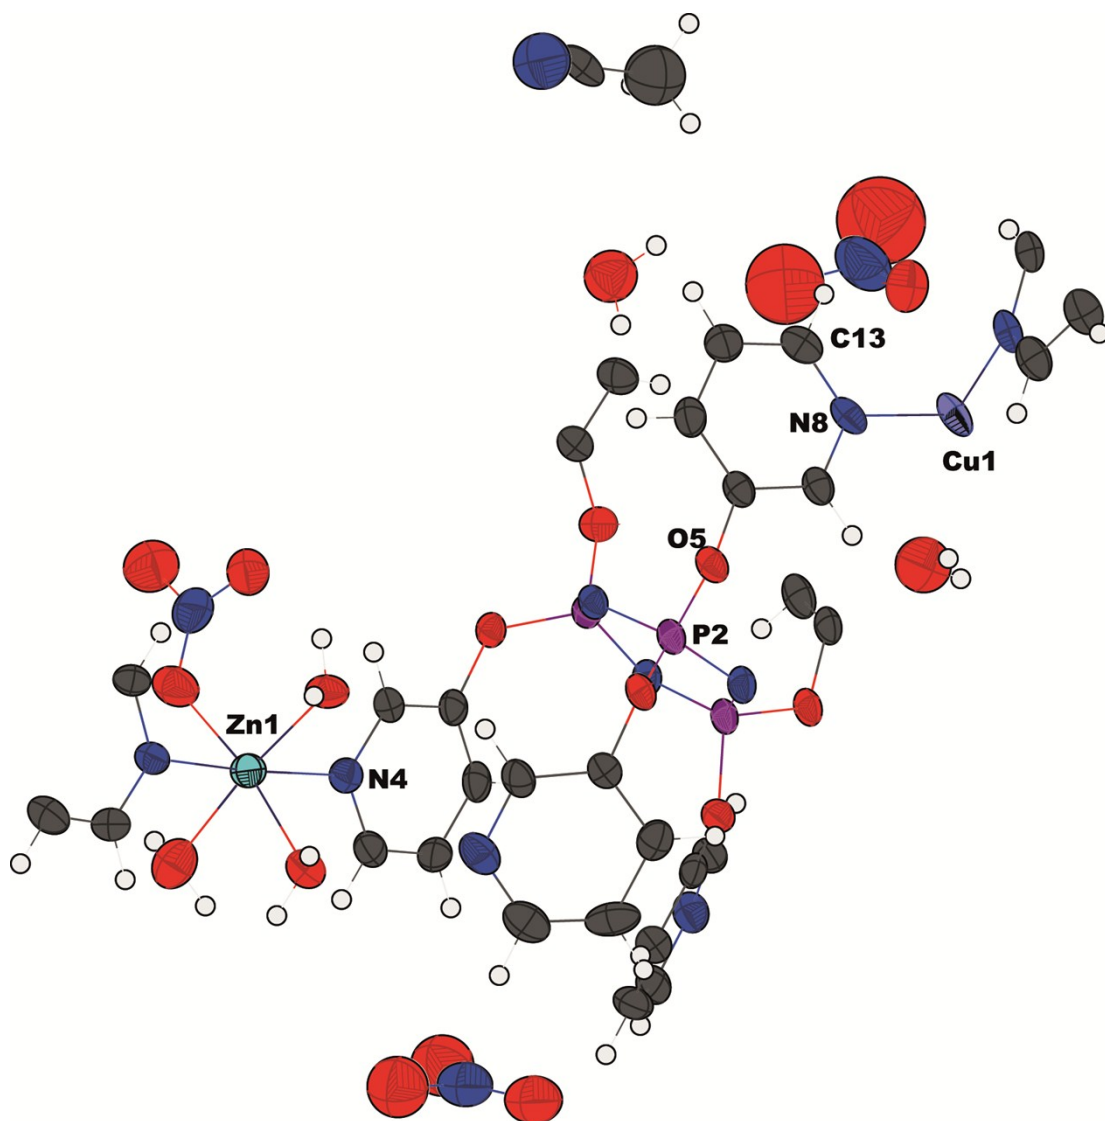

Figure S13. Thermal ellipsoid plot (50 % probability) of asymmetric unit of Compound 2 (other disordered part of the non-coordinating nitrate anions are omitted for clarity)

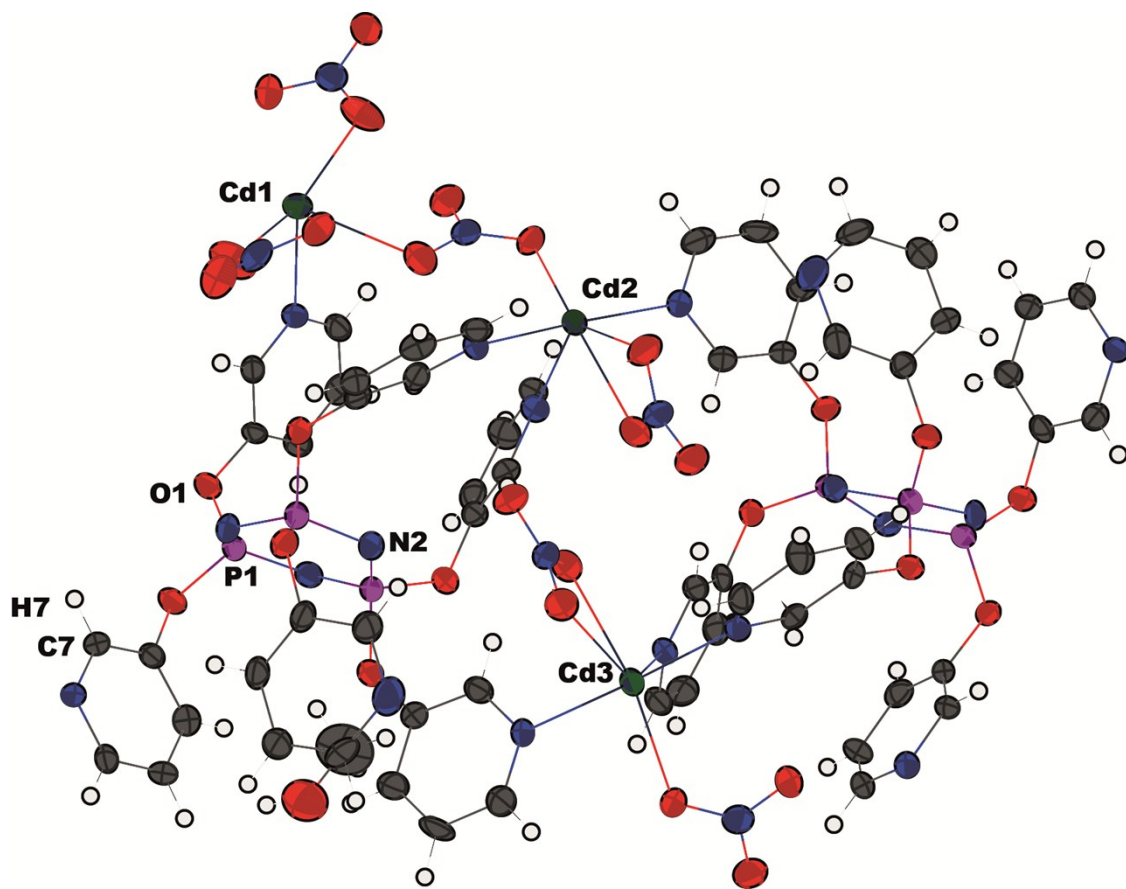

Figure S14. Thermal ellipsoid plot (50 % probability) of asymmetric unit of Compound 3

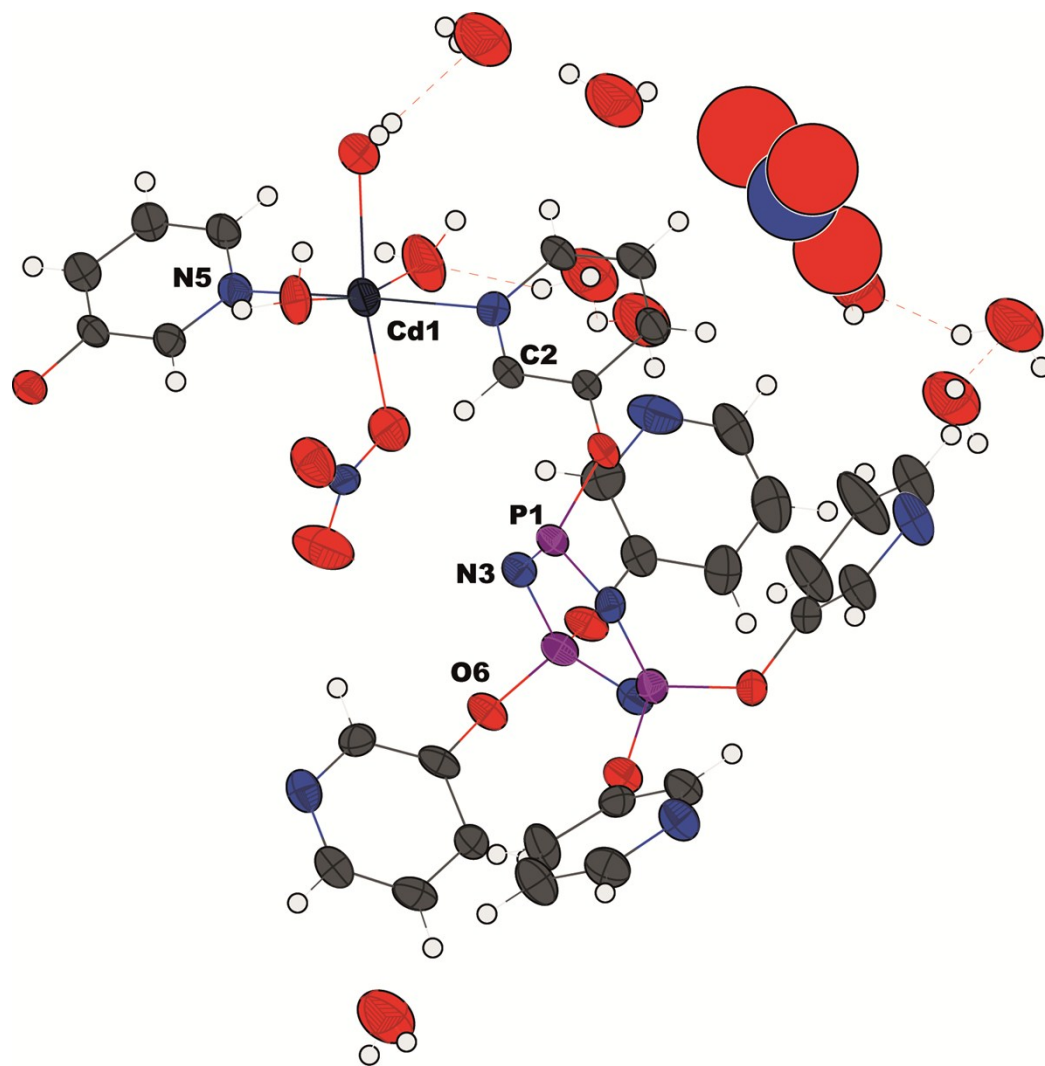

Figure S15. Thermal ellipsoid plot (50 % probability) of asymmetric unit of Compound 4
